# Supplementary material
Source: MDPI journal article supplement (https://www.mdpi.com/1999-4907/9/8/449)
Supplement: s1 [file s1]

## Sheet: Table S1
	Supplementary material for the publication Hydraulic constraints to whole-tree water use and respiration in young Cryptomeria trees under competition
	by Juan Pedro Ferrio, Yoko Kurosawa, Mofei Wang and Shigeta Mori
	Submitted to the Forests special issue "Water ang gas exchange in forests"; Available from https://doi.org/10.3390/f9080449,
	Table S1.		Individual values of the variables included in the study.
	tree ID	Age	PPFD (µmol m-2 s-1)	Tree Height (m)	Basal Area (BA, mm2)	BAI-3y (mm2 year-1)	Stem volume (cm3)	Root FW (kg)	Stem FW (kg)	Leaf FW (kg)	Shoot FW (kg)	Total FW (kg)	Root WC (%)	Stem base WC (%)	Stem top WC (%)	Leaf WC (%)	Stem base density (kg DW m-3)	Stem top density (kg DW m-3)	Root R (µmol CO2 s-1)	Stem R (µmol CO2 s-1)	Leaf R (µmol CO2 s-1)	Shoot R (µmol CO2 s-1)	Total R (µmol CO2 s-1)	Injected D2O (ml)	Peak Time (days)	D/H atom % Peak	D/H atom % Last Sample	Vel (cm day-1)	WU (g day-1)	t1/2 (days)	RT (days)
	1	8	733	0.86	201	32	78	0.12	0.1	0.19	0.3	0.42	0.57	0.46	0.54	0.67	705	587	0.05	0.04	0.11	0.15	0.19	1	0.98	0.00462	0.000155	8.6	334	0.46	2.29
	2	9	1134	2.77	1605	372	1673	2.18	2.28	3.52	5.8	7.98	0.62	0.56	0.62	0.65	430	480	0.47	0.44	1.58	2.02	2.49	9	0.97	0.001264	0.000155	53	3415	0.64	1.91
	3	9	719	1.8	775	127	473	0.6	0.56	1.01	1.57	2.17	0.57	0.51	0.59	0.66	589	569	0.1	0.13	0.4	0.53	0.63	3.5	0.97	0.003733	0.000157	21.7	1256	0.39	1.84
	4	7	756	1.5	268	53	200	0.23	0.21	0.47	0.68	0.91	0.55	0.51	0.55	0.65	649	554	0.04	0.05	0.17	0.22	0.26	1.8	1.14	0.003155	0.000179	11.7	513	0.82	3.55
	5	8	388	0.75	112	18	29	0.07	0.04	0.14	0.19	0.26	0.53	0.49	0.53	0.69	646	515	0.03	0.02	0.07	0.09	0.12	0.9	1.14	0.006142	0.000187	2.7	195	0.88	3.91
	6	10	745	1.76	516	87	374	0.35	0.38	0.73	1.11	1.46	0.55	0.5	0.59	0.64	537	530	0.06	0.12	0.28	0.4	0.45	2.5	0.96	0.001307	0.000155	16	994	0.58	2.24
	7	9	632	1.5	248	28	169	0.21	0.2	0.38	0.58	0.79	0.57	0.47	0.51	0.64	732	539	0.07	0.06	0.16	0.22	0.3	1.6	0.95	0.002549	0.000155	7.6	516	0.87	3.48
	8	10	366	0.8	140	18	31	0.07	0.05	0.19	0.25	0.31	0.53	0.47	0.5	0.68	649	773	0.02	0.02	0.07	0.09	0.11	0.8	1.13	0.001419	0.000162	1.8	300	0.61	2.02
	9	10	485	1.05	163	16	64	0.16	0.1	0.31	0.4	0.56	0.52	0.48	0.54	0.65	715	609	0.04	0.03	0.1	0.13	0.17	1	0.95	0.002068	0.000202	3.8	351	1.02	3.8
	10	8	723	1.67	413	74	285	0.41	0.39	1.03	1.42	1.83	0.56	0.48	0.55	0.63	637	562	0.13	0.17	0.28	0.45	0.58	3	1.12	0.001017	0.000155	17	1158	1.12	2.71
	11	9	628	1.45	173	29	94	0.14	0.13	0.34	0.47	0.61	0.59	0.49	0.55	0.64	667	607	0.05	0.07	0.11	0.17	0.22	1.6	1.12	0.000769	0.000157	8.6	637	1.48	3.38
	12	8	1043	2.29	862	197	678	0.72	0.91	1.46	2.3	3.02	0.61	0.52	0.6	0.68	689	597	0.19	0.15	0.57	0.72	0.91	3.6	1.95	0.000886	0.000155	7.8	1383	0.92	2.32
	13	9	535	1.37	448	91	282	0.22	0.29	0.53	0.81	1.03	0.57	0.54	0.56	0.64	596	458	0.06	0.1	0.19	0.29	0.35	1.9	1.11	0.001257	0.000154	3.2	738	0.44	1.42
	14	9	568	0.95	197	39	71	0.14	0.08	0.29	0.36	0.51	0.57	0.48	0.51	0.66	653	599	0.06	0.04	0.13	0.18	0.24	0.9	1.11	0.00134	0.000162	3.6	345	0.51	1.66
	15	8	1025	2.81	1580	391	1475	1.02	1.72	2.83	4.55	5.57	0.62	0.57	0.6	0.69	493	568	0.27	0.49	1.06	1.55	1.82	9	0.93	0.001747	0.000157	10.8	3271	0.59	2.79
	16	9	1060	2.51	969	235	845	0.87	1.02	1.57	2.59	3.46	0.62	0.52	0.59	0.66	642	672	0.2	0.3	0.74	1.04	1.24	5.5	1.11	0.001259	0.000158	6	2160	0.46	1.37
	17	9	871	1.97	493	112	419	0.38	0.54	0.77	1.31	1.69	0.62	0.51	0.56	0.66	659	654	0.09	0.17	0.33	0.5	0.59	2.5	1.1	0.002214	0.000157	3.6	779	0.86	3.19
	18	10	465	0.89	121	12	44	0.05	0.05	0.11	0.16	0.21	0.56	0.52	0.53	0.64	648	615	0.02	0.02	0.07	0.09	0.1	0.8	1.09	0.002125	0.000157	3.8	275	0.59	2.27
	19	10	792	1.71	604	118	362	0.23	0.34	0.57	0.91	1.14	0.61	0.52	0.56	0.67	698	630	0.06	0.09	0.19	0.28	0.34	1.8	1.1	0.000374	0.000159	4.2	775	2.26	3.3
	20	7	669	1.39	161	37	101	0.17	0.14	0.42	0.56	0.73	0.63	0.51	0.57	0.72	672	608	0.03	0.04	0.2	0.24	0.27	1.2	1.09	0.001378	0.000159	2.5	429	1.72	5.1
	21	7	498	1.45	209	35	133	0.09	0.15	0.24	0.39	0.48	0.53	0.46	0.52	0.62	683	584	0.04	0.06	0.1	0.16	0.19	0.9	1.09	0.001665	0.000156	2.4	307	1.53	4.94
	22	10	1065	2.39	841	172	654	0.56	0.93	1.13	2.06	2.62	0.6	0.55	0.59	0.63	542	540	0.16	0.26	0.5	0.77	0.92	3.6	1.09	0.001447	0.000157	4.3	1305	0.79	2.49
	23	8	772	1.48	435	85	231	0.23	0.26	0.59	0.85	1.07	0.58	0.52	0.54	0.65	647	601	0.09	0.1	0.18	0.28	0.37	1.6	1.09	0.001042	0.000154	5.7	649	0.44	1.27
	24	8	820	1.93	704	146	489	0.43	0.66	1.23	1.89	2.32	0.57	0.52	0.55	0.63	735	682	0.13	0.22	0.27	0.49	0.62	3.5	1.08	0.00132	0.000158	4	1296	1.15	3.65
	25	7	429	0.89	112	20	36	0.11	0.06	0.18	0.24	0.35	0.57	0.49	0.53	0.63	692	653	0.03	0.02	0.07	0.09	0.12	0.8	1.07	0.004711	0.000161	1.7	201	0.78	3.88
